# Supplementary material
Source: JCI journal article supplement (doi:10.1172/jci197028)

## Full unedited blots for Figure 2C

| Sample order | Genotype  |
|--------------|-----------|
| 1            | wild-type |
| 2            | matINSG   |
| 3            | wild-type |
| 4            | matINSG   |
| 5            | wild-type |
| 6            | matINSG   |
| 7            | wild-type |
| 8            | matINSG   |
| 9            | wild-type |
| 10           | matINSG   |

UBE3A Antibody Millipore Sigma, SAB1404508 – Chemiluminescence

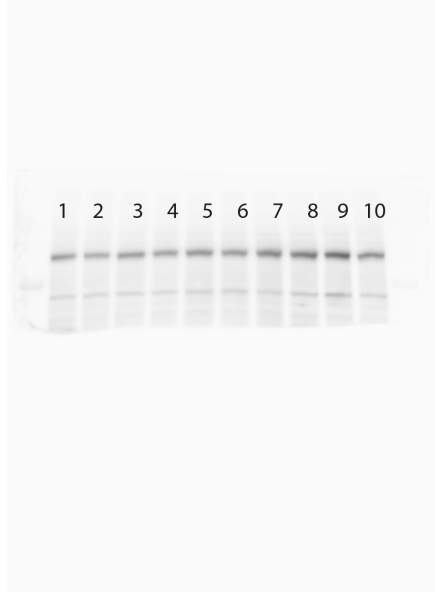

Visible light showing Precision Plus Protein™ All Blue Prestained Protein Standards

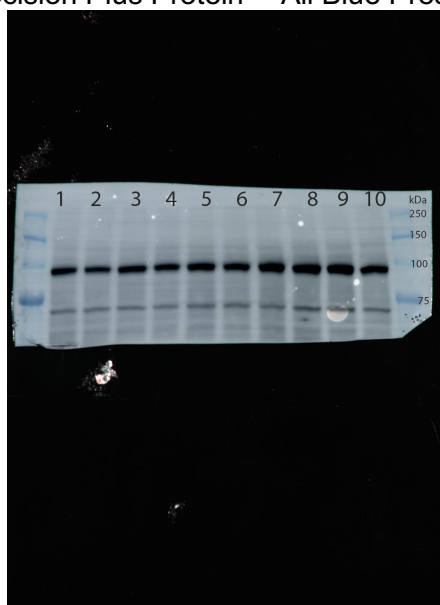

GAPDH Antibody Millipore Sigma, MAB374 – Chemiluminescence

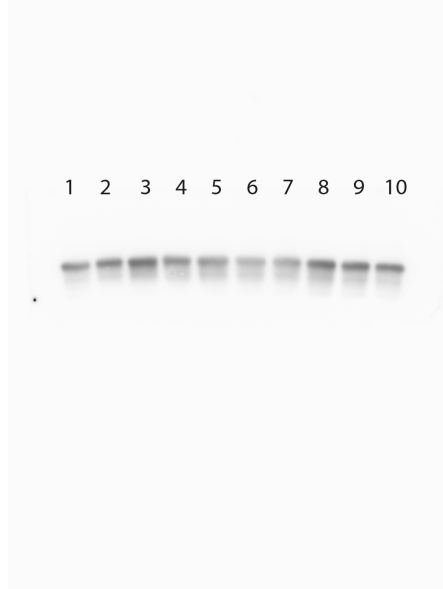

Visible light showing Precision Plus Protein™ All Blue Prestained Protein Standards

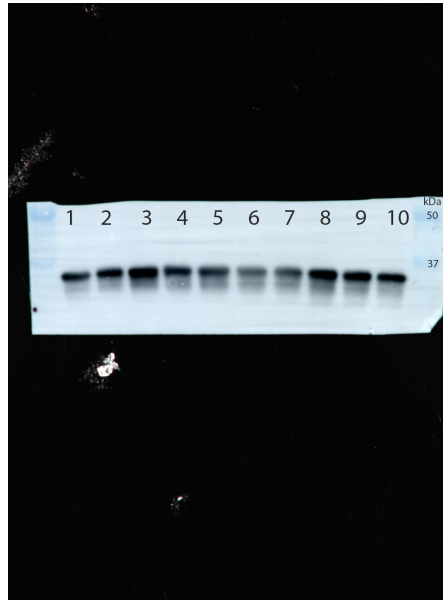

| Sample order | Genotype  |
|--------------|-----------|
| 1            | wild-type |
| 2            | patINSG   |
| 3            | wild-type |
| 4            | patINSG   |
| 5            | wild-type |
| 6            | patINSG   |
| 7            | wild-type |
| 8            | patINSG   |
| 9            | wild-type |
| 10           | patINSG   |

UBE3A antibody Millipore Sigma, SAB1404508 – Chemiluminescence

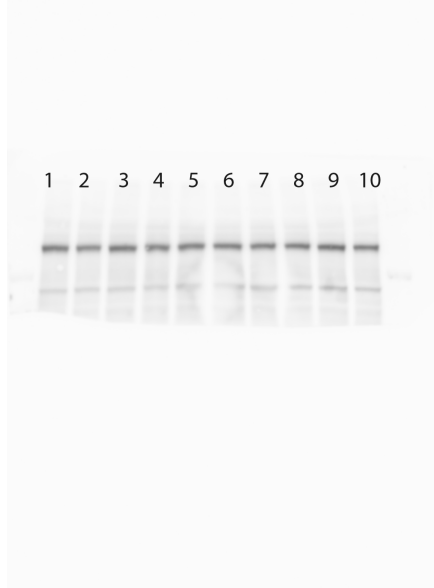

Visible light showing Precision Plus Protein™ All Blue Prestained Protein Standards

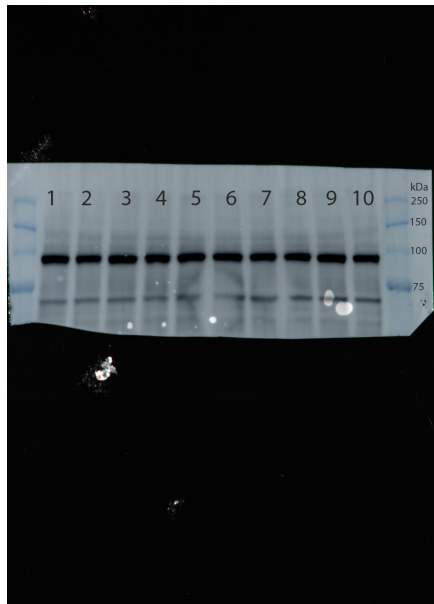

GAPDH Anitbody Millipore Sigma, MAB374 – Chemiluminescence

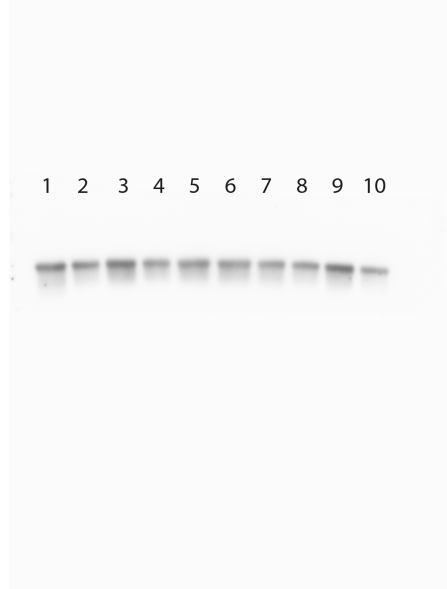

Visible light showing Precision Plus Protein™ All Blue Prestained Protein Standards

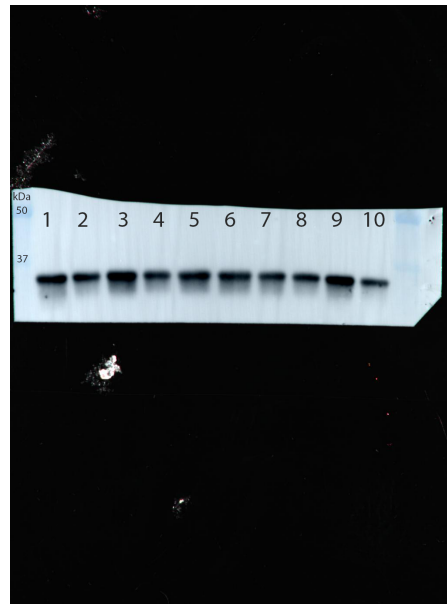

## Full unedited blots for Figure 12F

### Experiment I

| Sample order | Sample name  |
|--------------|--------------|
| 1            | NTC ASO      |
| 2            | ASO #3       |
| 3            | ASO #5       |
| 4            | ASO #2       |
| 5            | ASO #6       |
| 6            | ASO #1       |
| 7            | ASO #4       |
| 8            | not included |

UBE3A Antibody Millipore Sigma, SAB1404508 - Chemiluminescence

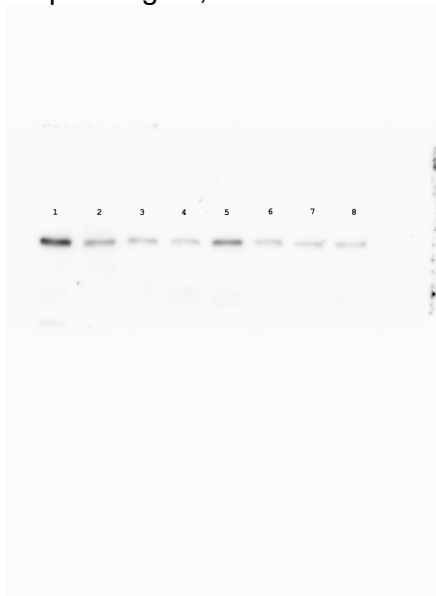

Visible light showing Precision Plus Protein™ All Blue Prestained Protein Standards

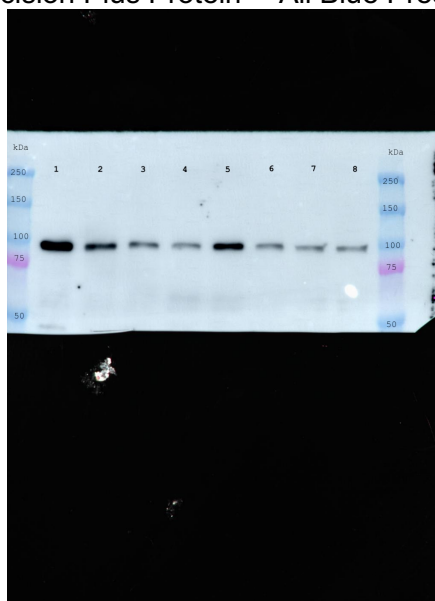

GAPDH Antibody Millipore Sigma, MAB374 – Chemiluminescence

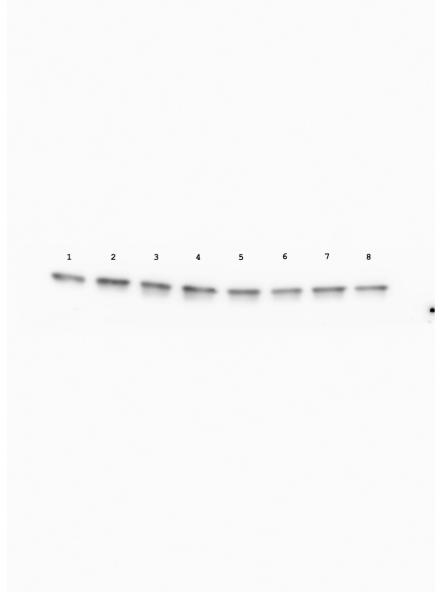

Visible light showing Precision Plus Protein™ All Blue Prestained Protein Standards

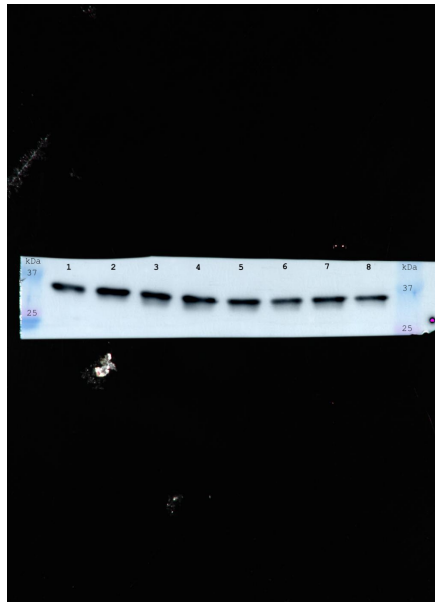

## Experiment II

| Sample order | Sample name |
|--------------|-------------|
| 1            | NTC ASO     |
| 2            | ASO #3      |
| 3            | ASO #5      |
| 4            | ASO #2      |
| 5            | ASO #6      |
| 6            | ASO #1      |
| 7            | ASO #4      |

UBE3A Antibody Millipore Sigma, SAB1404508 – Chemiluminescence

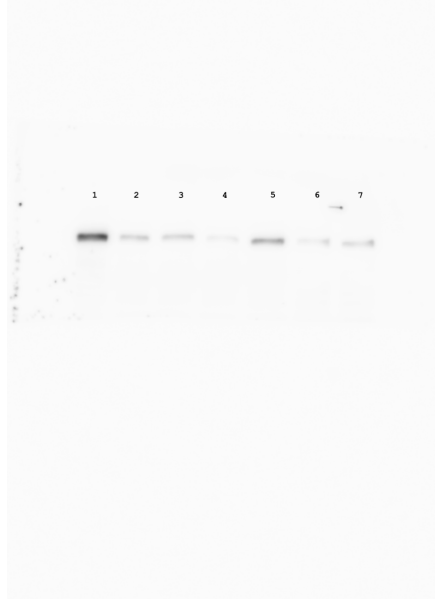

Visible light showing Precision Plus Protein™ All Blue Prestained Protein Standards

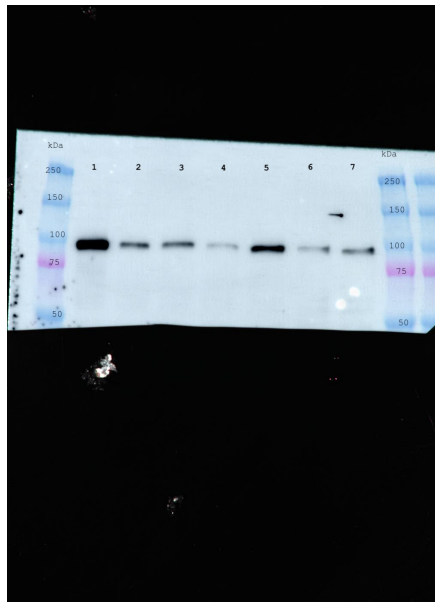

GAPDH Antibody Millipore Sigma, MAB374 – Chemiluminescence

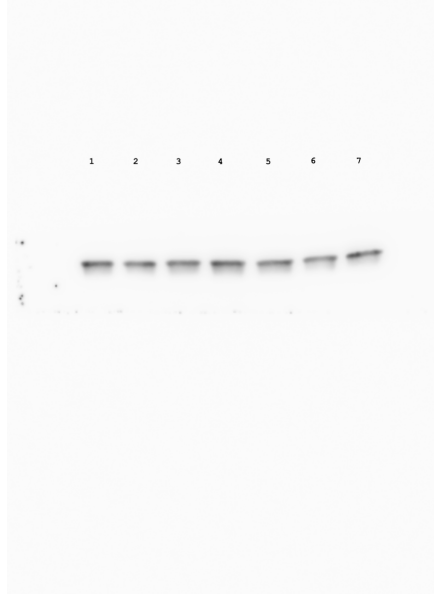

Visible light showing Precision Plus Protein™ All Blue Prestained Protein Standards

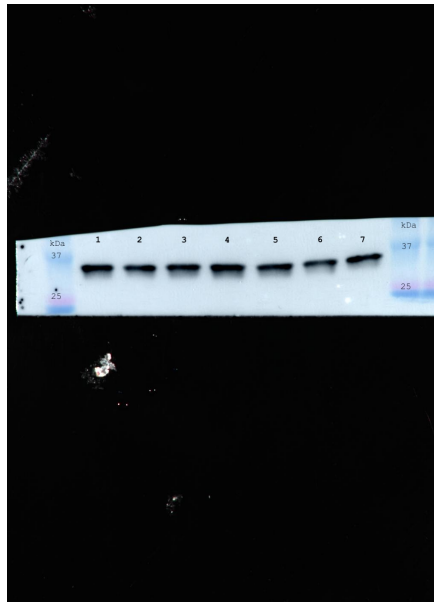

### Experiment III

| Sample order | Sample name  |
|--------------|--------------|
| 1            | NTC ASO      |
| 2            | ASO #3       |
| 3            | ASO #5       |
| 4            | ASO #2       |
| 5            | ASO #6       |
| 6            | ASO #1       |
| 7            | ASO #4       |
| 8            | not included |

UBE3A Antibody Millipore Sigma, SAB1404508 – Chemiluminescence

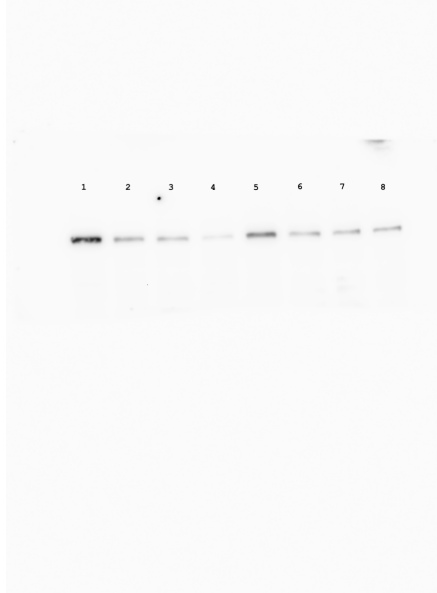

Visible light showing Precision Plus Protein™ All Blue Prestained Protein Standards

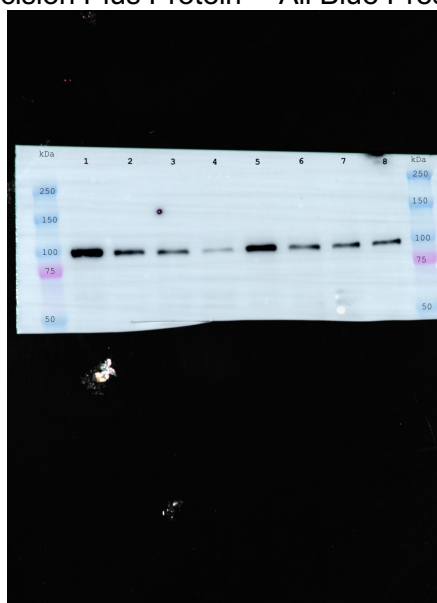

GAPDH Antibody Millipore Sigma, MAB374 – Chemiluminescence

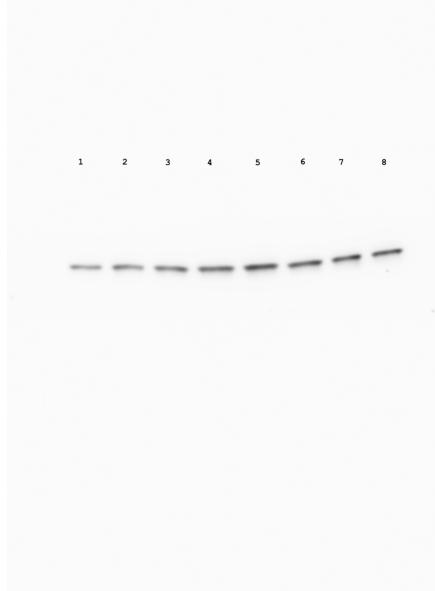

Visible light showing Precision Plus Protein™ All Blue Prestained Protein Standards

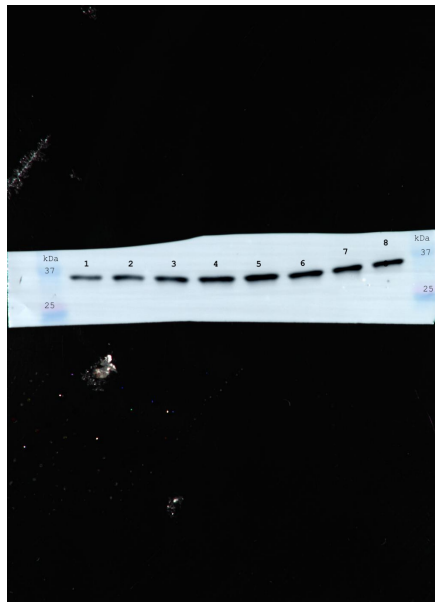

Supplement: sd2 [file 2]
