# Supplementary material
Source: JCI journal article supplement (doi:10.1172/jci197028)
Supplement: sd1 [file 1]

**Supplementary Data**  
(Supplementary Figures and Tables)

**A dual-reporter mouse for therapeutic discovery in Angelman syndrome**

Hanna Vihma<sup>1</sup>, Lucas M. James<sup>1</sup>, Hannah C. Nourie<sup>1</sup>, Audrey L. Smith<sup>1</sup>,  
Siyuan Liang<sup>1</sup>, Carlee A. Friar<sup>1</sup>, Tasmai Vulli<sup>1</sup>, Lei Xing<sup>1</sup>, Dale O. Cowley<sup>2,3</sup>,  
Alain C. Burette<sup>1,#</sup>, and Benjamin D. Philpot<sup>1,4,#</sup>

<sup>1</sup>Department of Cell Biology & Physiology, Neuroscience Center, University of North Carolina  
at Chapel Hill, NC, USA

<sup>2</sup>Animal Models Core, University of North Carolina at Chapel Hill, NC, USA

<sup>3</sup>Department of Genetics, University of North Carolina at Chapel Hill, NC, USA

<sup>4</sup>Carolina Institute for Developmental Disabilities, University of North Carolina at Chapel Hill,  
NC, USA

#Corresponding authors:

**BDP:** 7008C Mary Ellen Jones, 116 Manning Drive, Campus Box 7545, Chapel Hill, NC  
27599, USA. Telephone: +1 919-966-0031, bphilpot@med.unc.edu

**ACB:** 7004 Mary Ellen Jones, 116 Manning Drive, Campus Box 7545, Chapel Hill, NC  
27599, USA. Telephone: +1 919-966-0031, alain\_burette@med.unc.edu

**Conflict of Interest Statement:** DOC is employed by, has equity ownership in, and serves on the board of directors of TransViragen, the company contracted by UNC-Chapel Hill to manage its Animal Models Core Facility. BDP is a consultant for Astellas Gene Therapies.

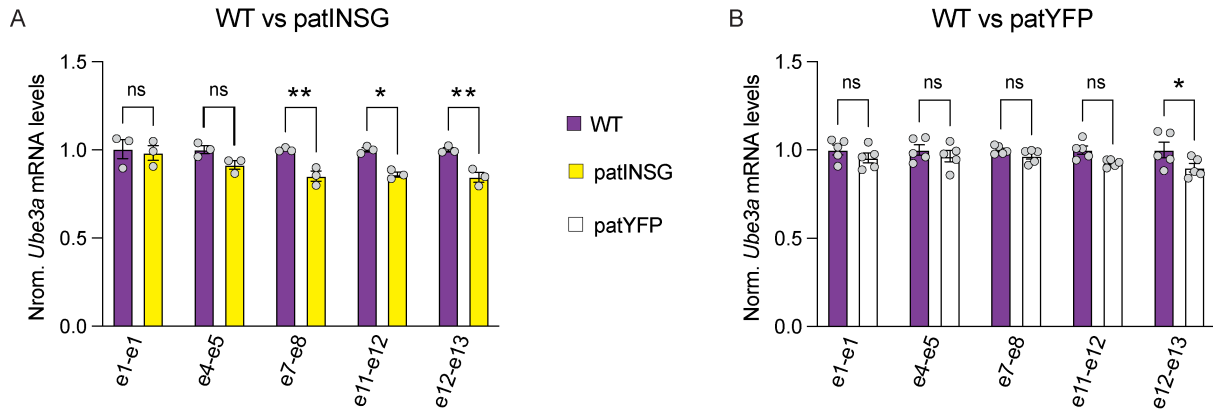

**Supplementary Figure 1. Reporter insertion selectively reduces *Ube3a* mRNA levels toward the 3' end of the transcript in both *Ube3a*-INSG and *Ube3a*-YFP mouse models.** Quantification of *Ube3a* mRNA transcript levels in the brain by RT-qPCR using primer sets targeting different exons, as indicated in the figure, comparing (A) WT with patINSG and (B) WT with patYFP mice. Data are normalized to *Eif4a2* (two-way ANOVA, Bonferroni's *post hoc* test). Each data point represents an individual animal, with data shown as means  $\pm$  SEM. ns = non-significant, \*P < 0.05, \*\*P < 0.005. Norm., normalized; e, exon.

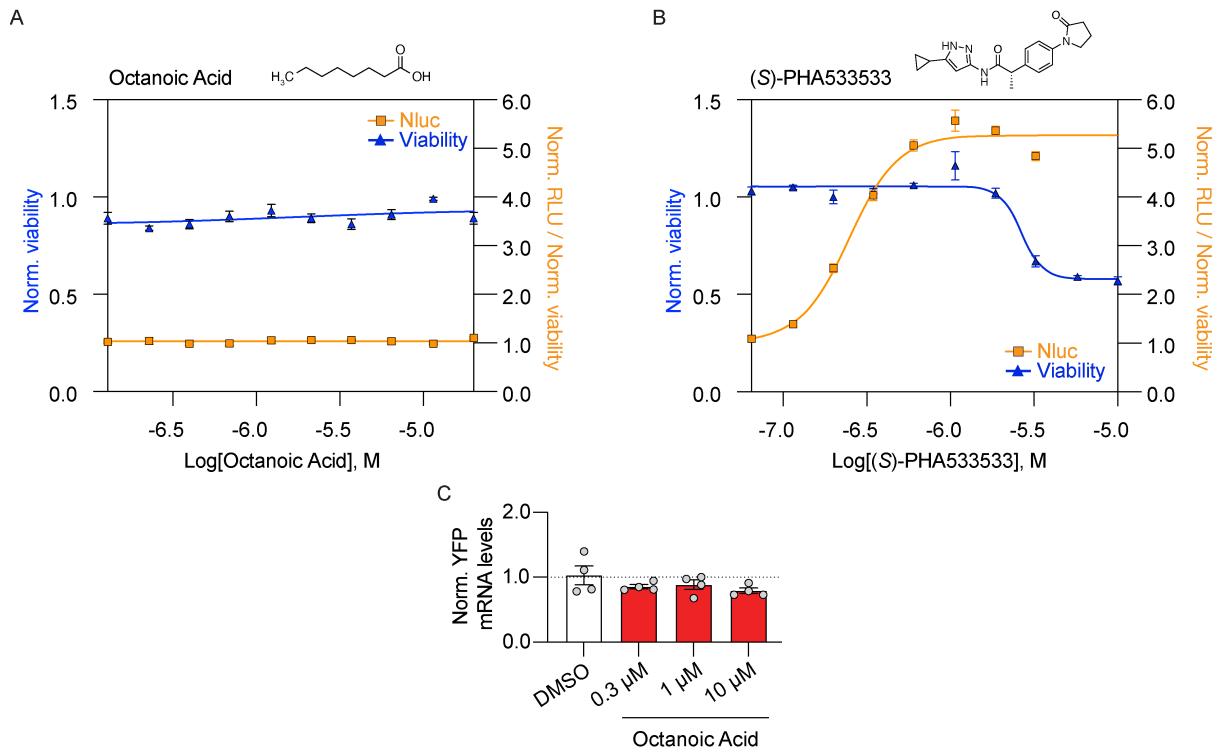

**Supplementary Figure 2. Octanoic acid does not produce unsilencing of paternal *Ube3a* in patINSG or patYFP neurons.** Dose response assay in patINSG neurons using luciferase readout normalized to viability for (A) octanoic acid, and (B) (S)-PHA533533, used as a positive control. (C) Quantification of YFP mRNA levels by RT-qPCR, normalized to *Eif4a2* levels, in patYFP neurons following octanoic acid treatments. Drug treatments were administered for 72 hours. Assays were performed as follows: (A-B) N = 1; performed in quadruplicate individual wells; (C) N = 1; performed in quadruplicate individual wells, each analyzed in quadruplicate. Norm, normalized.

**Supplementary Table 1. Sequences of primers used for genotyping:**

| <b>Mouse line</b>  | <b>Primer name</b> | <b>Sequence</b>                      |
|--------------------|--------------------|--------------------------------------|
| <i>Ube3a</i> -INSG | sfGFP_Foward       | 5'- GGA TCA CAT GAAACG GCA TGA C -3' |
|                    | sfGFP_Reverse      | 5'- GTC TGC CGT GAT GTA TAC -3'      |
| <i>Ube3a</i> -YFP  | Ube3aYFP_Foward    | 5'- CAC ATG AAG CAG CAC GAC TT -3'   |
|                    | Ube3aYFP_Reverse   | 5'- AGT TCA CCT TGA TGC CGT TC -3'   |

**Supplementary Table 2. Antibodies used:**

|                            |                 |                                                                    | <b>Primary Antibody</b>                                                                      | <b>Secondary Antibody</b>                                                                                                          |
|----------------------------|-----------------|--------------------------------------------------------------------|----------------------------------------------------------------------------------------------|------------------------------------------------------------------------------------------------------------------------------------|
| <b>Confocal microscopy</b> | <b>GFP</b>      | Antibody<br>Host, type<br>Dilution<br>Company, #Cat.<br>Reference  | anti-GFP<br>Chicken, polyclonal<br>1/1000<br>Abcam, ab13970<br>RRID:AB_300798                | Anti-chicken IgY, Alexa Fluor 488<br>Donkey, polyclonal<br>1/400<br>Jackson ImmunoResearch Labs, 703-545-155<br>RRID:AB_2340375    |
|                            | <b>SOX9</b>     | Antibody<br>Host<br>Dilution<br>Company, #Cat.<br>Reference        | anti-SOX9<br>Goat, polyclonal<br>1/1000<br>R and D Systems, AF3075<br>RRID:AB_2194160        | anti-goat IgG, Alexa Fluor Plus 555<br>Donkey, polyclonal<br>1/400<br>Thermo Fisher Scientific, A32816<br>RRID:AB_2762839          |
|                            | <b>NeuN</b>     | Antibody<br>Host, type<br>Dilution<br>Company, #Cat.<br>Reference  | anti-NeuN<br>Guinea pig, polyclonal<br>1/1000<br>Millipore, ABN90<br>RRID:AB_11205592        | anti-guinea pig IgG, Alexa Fluor 594<br>Donkey, polyclonal<br>1/400<br>Jackson ImmunoResearch Labs, 706-585-148<br>RRID:AB_2340474 |
|                            | <b>UBE3A</b>    | Antibody<br>Host, type<br>Dilution<br>Company, #Cat.<br>Reference  | anti-UBE3A<br>Mouse, monoclonal<br>1/1000<br>Sigma-Aldrich, SAB1404508<br>RRID:AB_10740376   | anti-mouse IgG, Alexa Fluor 647<br>Donkey, polyclonal<br>1/400<br>Abcam, ab150111<br>RRID:AB_2890625                               |
|                            | <b>DCX</b>      | Antibody<br>Host, type<br>Dilution<br>Company, #Cat.<br>Reference  | anti-doublecortin<br>Rabbit, polyclonal<br>1/1000<br>Cell Signaling, 4604S<br>RRID:AB_561007 | Anti-rabbit pig IgG, Alexa Fluor 594<br>Donkey, polyclonal<br>1/400<br>Jackson ImmunoResearch Labs, 711-585-152<br>RRID:AB_2340621 |
| <b>STED</b>                | <b>GFP</b>      | Host, type<br>Dilution<br>Company, #Cat.<br>Reference<br>Reference | anti-GFP<br>Chicken, polyclonal<br>1/1000<br>Abcam, ab13970<br>RRID:AB_300798                | anti-chicken IgY, Alexa Fluor 594<br>Donkey, polyclonal<br>1/400<br>Jackson ImmunoResearch Labs, 703-585-155<br>RRID:AB_2340377    |
|                            | <b>Lamin B1</b> | Antibody<br>Host, type<br>Dilution<br>Company, #Cat.<br>Reference  | anti-Lamin B1<br>Rabbit, polyclonal<br>1/1000<br>Abcam, ab16048<br>RRID:AB_443298            | anti-rabbit IgG, ATTO 647N<br>Goat, polyclonal<br>1/400<br>Rockland, 611-156-122<br>RRID:AB_10893043                               |
| <b>LSFM</b>                | <b>GFP</b>      | Antibody<br>Host, type<br>Dilution<br>Company, #Cat.<br>Reference  | anti-GFP<br>Rabbit, polyclonal<br>1/1000<br>Novus, NB600-308<br>RRID:AB_10003058             | anti-rabbit IgG, Alexa Fluor Plus 647<br>Donkey, polyclonal<br>1/500<br>Thermo Fisher Scientific, A32795TR<br>RRID:AB_2866496      |
| <b>ICC</b>                 | <b>GFP</b>      | Antibody<br>Host, type<br>Dilution<br>Company, #Cat.<br>Reference  | anti-GFP<br>Rabbit, polyclonal<br>1/1000<br>Novus, NB600-308<br>RRID:AB_10003058             | anti-rabbit IgG1, Alexa Fluor 488<br>Goat, polyclonal<br>1/500<br>Thermo Fisher Scientific, A11008<br>RRID:AB_143165               |
|                            | <b>NeuN</b>     | Antibody<br>Host, type<br>Dilution<br>Company, #Cat.<br>Reference  | anti-NeuN<br>Mouse, monoclonal<br>1/500<br>Millipore Sigma, MAB377<br>RRID:AB_2298772        | anti-mouse IgG, Alexa Fluor 568<br>Goat, polyclonal<br>1/500<br>Thermo Fisher Scientific, A21124<br>RRID:AB_2535766                |
| <b>Western blotting</b>    | <b>UBE3A</b>    | Antibody<br>Host, type<br>Dilution<br>Company, #Cat.<br>Reference  | anti-UBE3A<br>Mouse, monoclonal<br>1/1000<br>Millipore Sigma, SAB1404508<br>RRID:AB_10740376 | anti-mouse IgG, HRP<br>Goat, polyclonal<br>1/5000<br>Thermo Fisher Scientific, 31430<br>RRID:AB_228307                             |
|                            | <b>GAPDH</b>    | Antibody<br>Host, type<br>Dilution<br>Company, #Cat.<br>Reference  | anti-GAPDH<br>Mouse, monoclonal<br>1/1000<br>Millipore Sigma, MAB374<br>RRID:AB_2107445      | anti-mouse IgG, HRP<br>Goat, polyclonal<br>1/5000<br>Thermo Fisher Scientific, 31430<br>RRID:AB_228307                             |

**Supplementary Table 3. Sequences of primers used for RT-qPCR:**

| <b>Primer name</b> | <b>Sequence</b>                |
|--------------------|--------------------------------|
| mUbe3a_ex1_Forward | 5'-TGGCGCCTCCTTCTGCTTCTCT-3'   |
| mUbe3a_ex1_Reverse | 5'-ACCTTGAAGTCGGCGCTGAAGC-3'   |
| mUbe3a_e4_Forward  | 5'-ATCCCAGTCTGAGGACATTGA-3'    |
| mUbe3a_e5_Reverse  | 5'-GCACAAAACCTCATTTCGTGCAG-3'  |
| mUbe3a_e7_Forward  | 5'-GAGTAGATGAGGGAGGCGTT-3'     |
| mUbe3a_e8_Reverse  | 5'-CAGACCCAGGACTATGCCAA-3'     |
| mUbe3a_e11_Forward | 5'-ACGGTGGCTATACGAGGGAA-3'     |
| mUbe3a_e12_Reverse | 5'-CCAACAGGTGCTCTGTCTGT-3'     |
| mUbe3a_e12_Forward | 5'-GCACCTGTTGGAGGACTAGG-3'     |
| mUbe3a_e13_Reverse | 5'-GTGATGGCCTTCAACAATCTC-3'    |
| Eif4a2_Forward     | 5'-TCTCAATACAAGGCCCAAGG-3'     |
| Eif4a2_Reverse     | 5'-CTCTTTCCTTCTGGTCCATGTC-3'   |
| mUbe3a-ATS_Forward | 5'-ACAGAACAATAGGTCACCAGGTT-3'  |
| mUbe3a-ATS_Reverse | 5'-AAGCAAGACTGTTACCTCAT-3'     |
| sfGFP_Forward      | 5'-TGTCCGTGGAGAGGGTGAAGGT-3'   |
| sfGFP_Reverse      | 5'-GCACGCGTCTTGTAGGTCCCGT-3'   |
| YFP_Forward        | 5'-ACATGAAGCAGCAGCAGCTTCT-3'   |
| YFP_Reverse        | 5'-GACGTTGTGGCTGTTGTAGTTGTA-3' |

**Supplementary Table 4. ASO sequences with detailed chemical modifications:**

| <b>Name</b>                     | <b>Base/Backbone Modifications</b>                                                                                                         |
|---------------------------------|--------------------------------------------------------------------------------------------------------------------------------------------|
| <i>Ube3a</i> -ATS-targeting ASO | +A*+A*+C*+T*c*a*t*a*c*a*c*a*c*a*t*+T*+A                                                                                                    |
| <i>Ube3a</i> -targeting ASO #1  | /52MOErA/*i2MOErA/*i2MOErG/* i2MOErC/*T*G* T*G*G* C*C*A* T*T*/i2MOErC/*<br>/i2MOErG/*i2MOErG*/32MOErT/                                     |
| <i>Ube3a</i> -targeting ASO #2  | /52MOErC/*i2MOErA/*i2MOErT/* i2MOErT/*C*T* C*C*G* A*A*T* C*T*/i2MOErG/*<br>/i2MOErG/*i2MOErT*/32MOErC/                                     |
| <i>Ube3a</i> -targeting ASO #3  | /52MOErC/*i2MOErG/*i2MOErT/* i2MOErA/*i2MOErT/*A* G*C*C* A*C*C* G*T*C*<br>/i2MOErA/*i2MOErT/*i2MOErA/* i2MOErC*/32MOErT/                   |
| <i>Ube3a</i> -targeting ASO #4  | /52MOErC/*i2MOErC/*i2MOErT/* i2MOErT/*i2MOErC/*C* T*G*T* T*T*T* C*A*T*<br>/i2MOErT/*i2MOErT/*i2MOErG/* i2MOErT*/32MOErA/                   |
| <i>Ube3a</i> -targeting ASO #5  | /52MOErT/*i2MOErT/*i2MOErT/* i2MOErG/*T*T* G*C*A* A*T*A* G*G*/i2MOErC/*<br>/i2MOErT/*i2MOErT/*i2MOErG*/32MOErA/                            |
| <i>Ube3a</i> -targeting ASO #6  | /52MOErA/* i2MOErT/* i2MOErT/* i2MOErMeC/* i2MOErG/* G* C* T* A* G* C* T* T* C* A*<br>/i2MOErA/* i2MOErT/* i2MOErG/* i2MOErT/* /32MOErMeC/ |
| Non-targeting control ASO       | /52MOErG/*i2MOErC/*i2MOErG/* i2MOErA/*i2MOErC/*T* A*T*A* C*G*C* G*C*A*<br>/i2MOErA/*i2MOErT/*i2MOErA/* i2MOErT*/32MOErG/                   |
